# Supplementary material
Source: Research Square preprint supplement (doi:10.21203/rs.3.rs-8050820/v1)
Supplement: Supplementary file 1 [file 429753c49f1fe6a430ffdfd6.docx]

**Supplementary Figure 1D**. (Left Panel) BALF from healthy subjects, normal smokers, COPD subjects, and HIV+ subjects was incubated with recombinant CXCL11 for 24 hours, and CXCL11 immunoblots were performed. (Right Panel) Immunoblots for CXCL11 were conducted after recombinant CXCL11 was added to HIV+ BALF pretreated with EDTA to inhibit MMP activity.

**
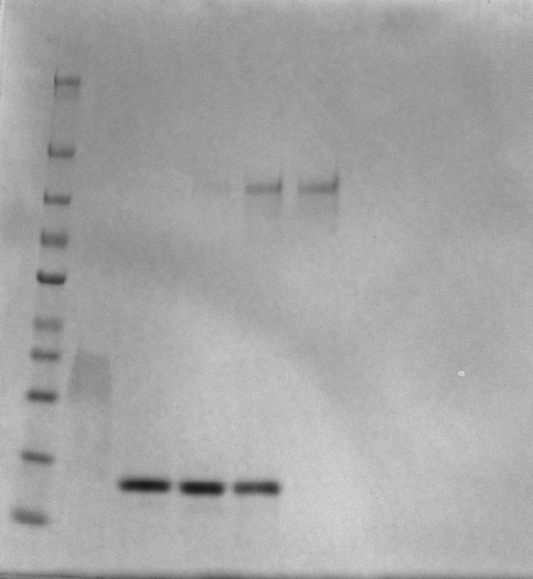
**

**
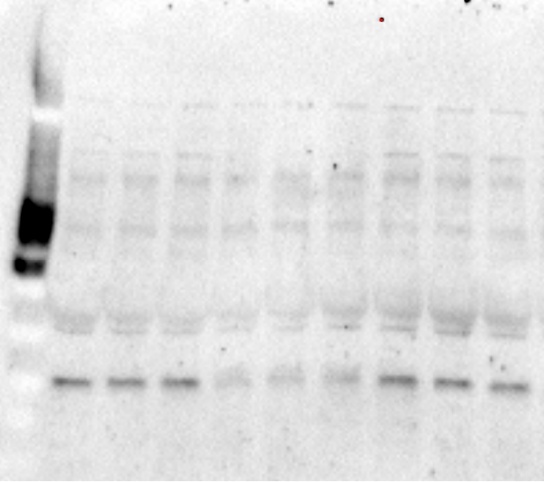
**
